# Supplementary material
Source: PubMed Central journal article supplement (PMC4703324)
Supplement: NIHMS747692-supplement-supplement_1.pdf [file NIHMS747692-supplement-supplement_1.pdf]

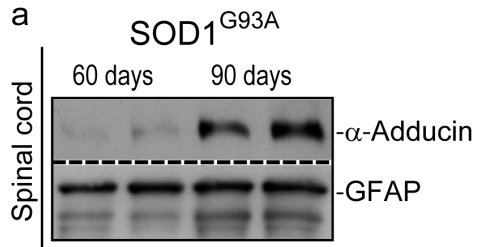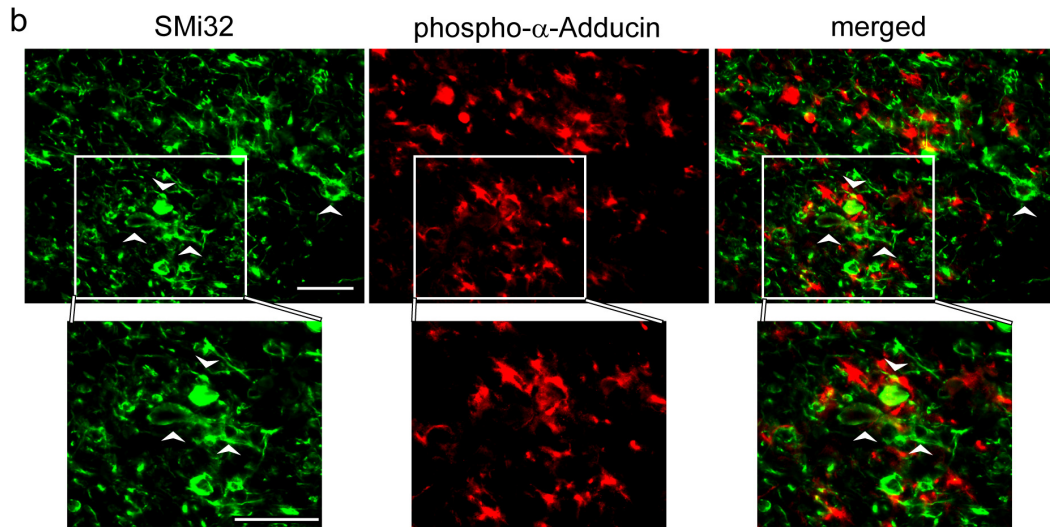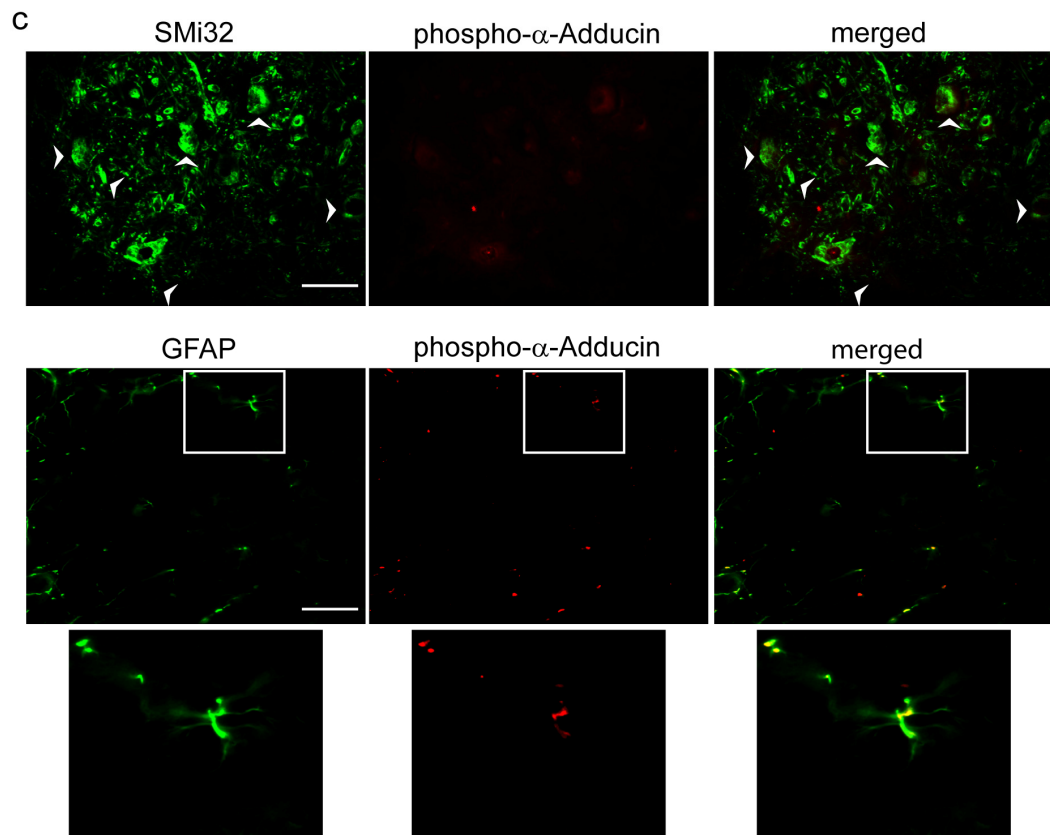

Supplementary Figure 1

$\alpha$ -Adducin in spinal cord is upregulated in symptomatic SOD1<sup>G93A</sup> spinal cord within astrocytes.

(a) Immunoblots for  $\alpha$ -Adducin protein at 60 and 90 day old SOD1<sup>G93A</sup> mice show  $\alpha$ -Adducin is upregulated at 90 days. (b) Immunohistochemistry with in sections of the lumbar spinal cord from symptomatic SOD1<sup>G93A</sup> mice displays Ser436-phosphorylated  $\alpha$ -Adducin does not co-localize with the motor neuron marker (SMi32). Arrowheads indicate motor neurons; scale bar 50 $\mu$ m. (c) Immunohistochemistry from sections of control wild type lumbar spinal cord displays Ser436-phosphorylated  $\alpha$ -Adducin does not co-localize with the motor neuron marker (SMi32); *upper panels*. Arrowheads indicate motor neurons. Immunohistochemistry from sections of control wild type lumbar spinal cord displays Ser436-phosphorylated  $\alpha$ -Adducin co-localize with the astrocyte marker (GFAP) lower panels. Scale bar 50 $\mu$ m. (a) are cropped; full length images are presented in **Supplementary Figure 11**.

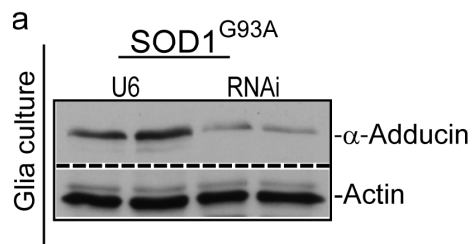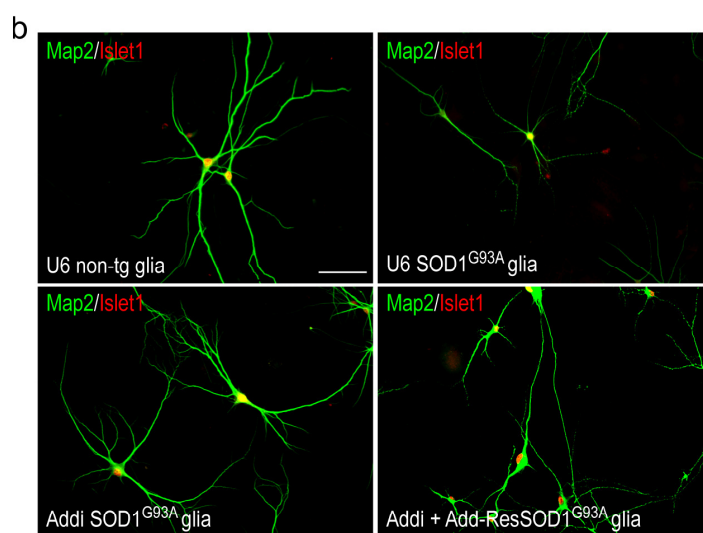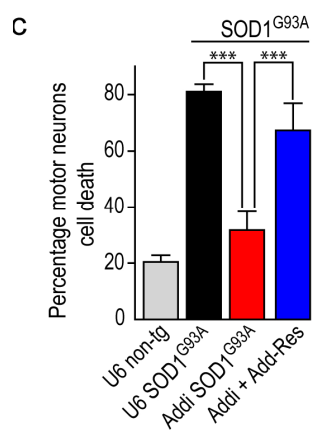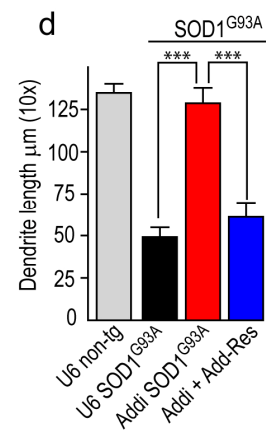

### Supplementary Figure 2

Expression of a RNAi-resistant form of  $\alpha$ -Adducin in SOD1<sup>G93A</sup> astrocytes restores the ability of SOD1<sup>G93A</sup> astrocytes to induce non-cell autonomous motor neuron cell death.

(a) Knockdown of  $\alpha$ -Adducin relative to control U6 in astrocytes (b) Co-cultured astrocytes and motor neurons were subjected to immunocytochemistry with the motor neuron nuclear protein Islet1 (red) and the dendrite protein MAP2 (green); scale bar 50 $\mu$ m. Wild type astrocytes transfected with the control U6 or  $\alpha$ -Adducin RNAi plasmid had little or no effect on motor primary motor neurons cell death or dendrite abnormalities (*upper left panel*); quantified (c and d). Control U6 SOD1<sup>G93A</sup> astrocytes induced non-cell autonomous motor neuron cell death and dendrite abnormalities (*upper right panel*); quantified (c and d). Knockdown of  $\alpha$ -Adducin in SOD1<sup>G93A</sup> astrocytes protected motor neurons against the non-cell autonomous cell death and dendrite abnormalities (*lower left panel*); quantified (c and d). Expressions of an RNAi-resistant form of  $\alpha$ -Adducin (Add-Res) in the background of  $\alpha$ -Adducin RNAi in SOD1<sup>G93A</sup> astrocytes restored the ability of the SOD1<sup>G93A</sup> astrocytes to induce non-cell autonomous cell death and dendrite abnormalities in motor neurons (*lower right panel*); quantified (d and e). All data in bar charts show mean  $\pm$  s.e.m (\*\*\*p<0.001; unpaired t-test). (a) are cropped; full length images are presented in **Supplementary Figure 11**.



a

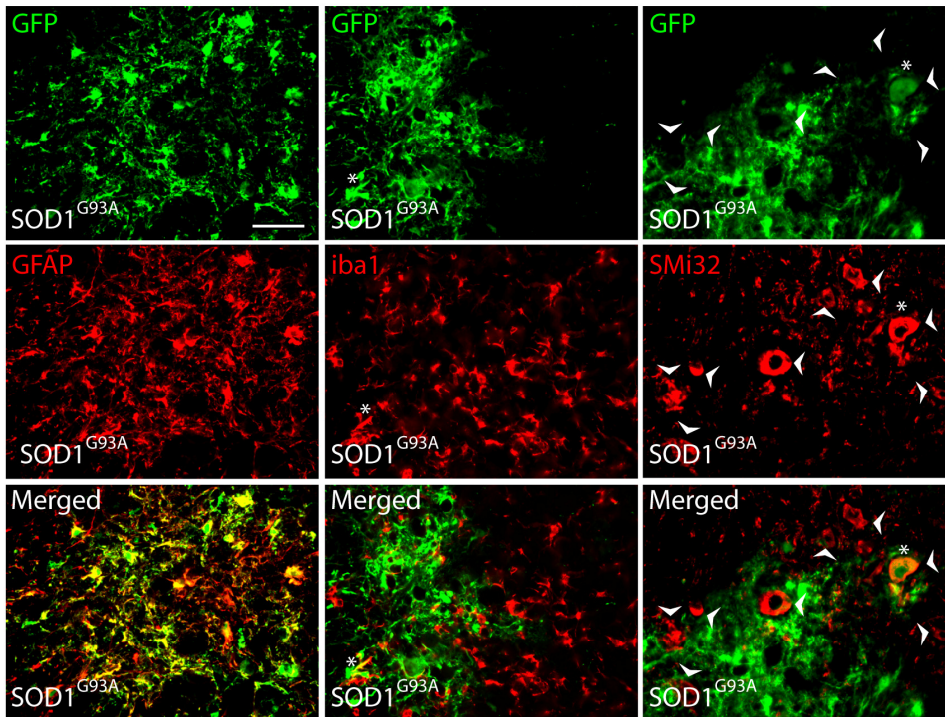

b

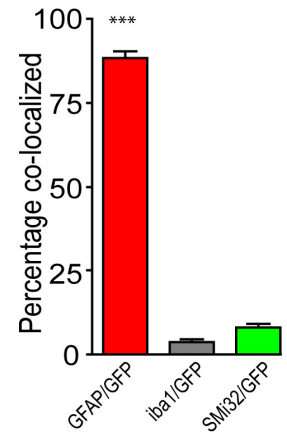

c

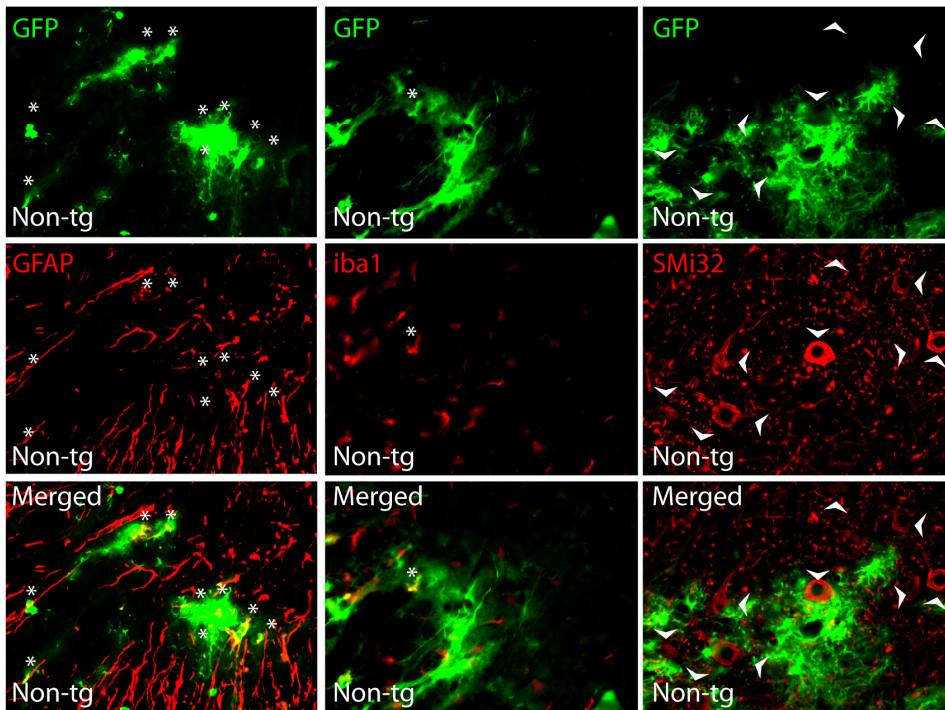

d

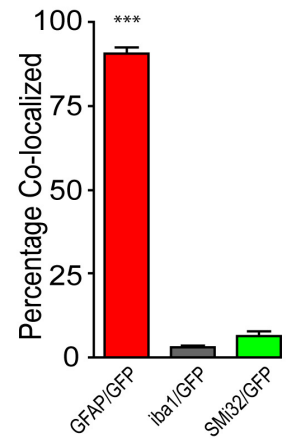

### Supplementary Figure 3

Lentiviral mediated knockdown *in vivo* predominately target astrocytes.

**(a)** Immunohistochemistry with GFP in sections of the lumbar spinal cord from SOD1<sup>G93A</sup> mice displaying percent GFP positive astrocytes (GFAP), microglia (Iba1) and motor neurons (SMi32) 30 days post-injection. Arrowheads indicate motor neurons; scale bar 50 $\mu$ m. **(b)** Quantifications of percent GFP positive cells revealed lentivirus predominately target astrocytes; n= $\sim$ 300 per cell type/three. All data in bar charts show  $\pm$  s.e.m (\*\*\*)p<0.001; ANOVA). **(c)** Immunohistochemistry with GFP in sections of the lumbar spinal cord from wild type mice displaying percent GFP positive astrocytes (GFAP), microglia (Iba1) and motor neurons (SMi32) 30 days post-injection. Arrowheads indicate motor neurons; scale bar 50 $\mu$ m. **(d)** Quantifications of percent GFP positive cells revealed lentivirus predominately target astrocytes; n= $\sim$ 300 per cell type/three. All data in bar charts show  $\pm$  s.e.m (\*\*\*)p<0.001; unpaired t-test).

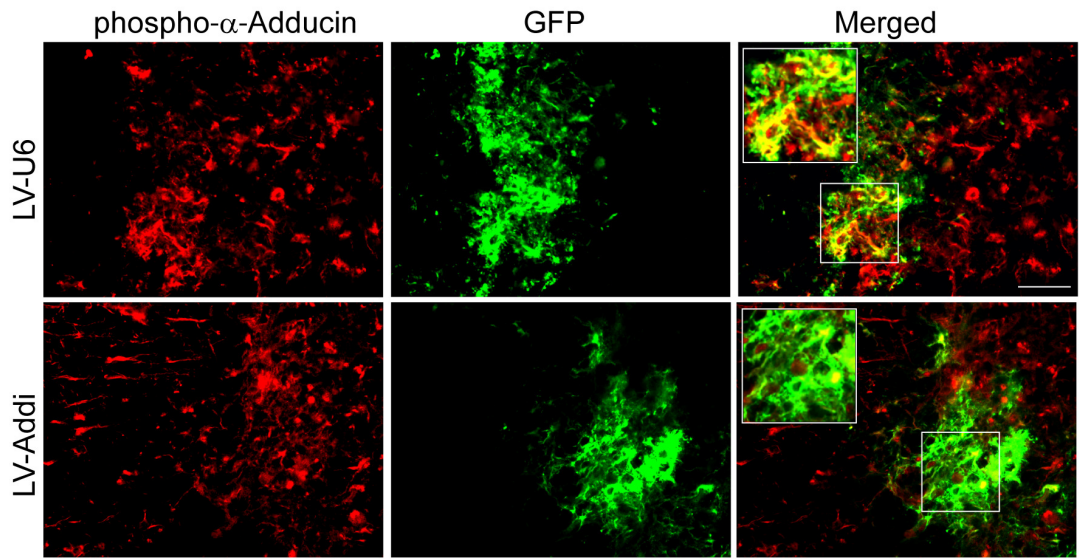

#### Supplementary Figure 4

Knockdown of  $\alpha$ -Adducin in SOD1<sup>G93A</sup> mice decreases immunoreactivity for phosphorylated Ser436- $\alpha$ -Adducin.

Spinal cord from SOD1<sup>G93A</sup> mice injected intraspinally with lentivirus expressing short hairpin RNAs targeting  $\alpha$ -Adducin and encoding GFP (LV-Addi) or the corresponding control U6 (LV-U6) were subjected to immunohistochemistry using GFP and phospho- $\alpha$ -Adducin (red) antibodies. Knockdown of  $\alpha$ -Adducin (LV-Addi) led to a decreased in immunoreactivity of phospho- $\alpha$ -Adducin within the GFP-labeled ventral horn as compared to control U6 (LV-U6) injected ventral horn; scale bar 50 $\mu$ m.

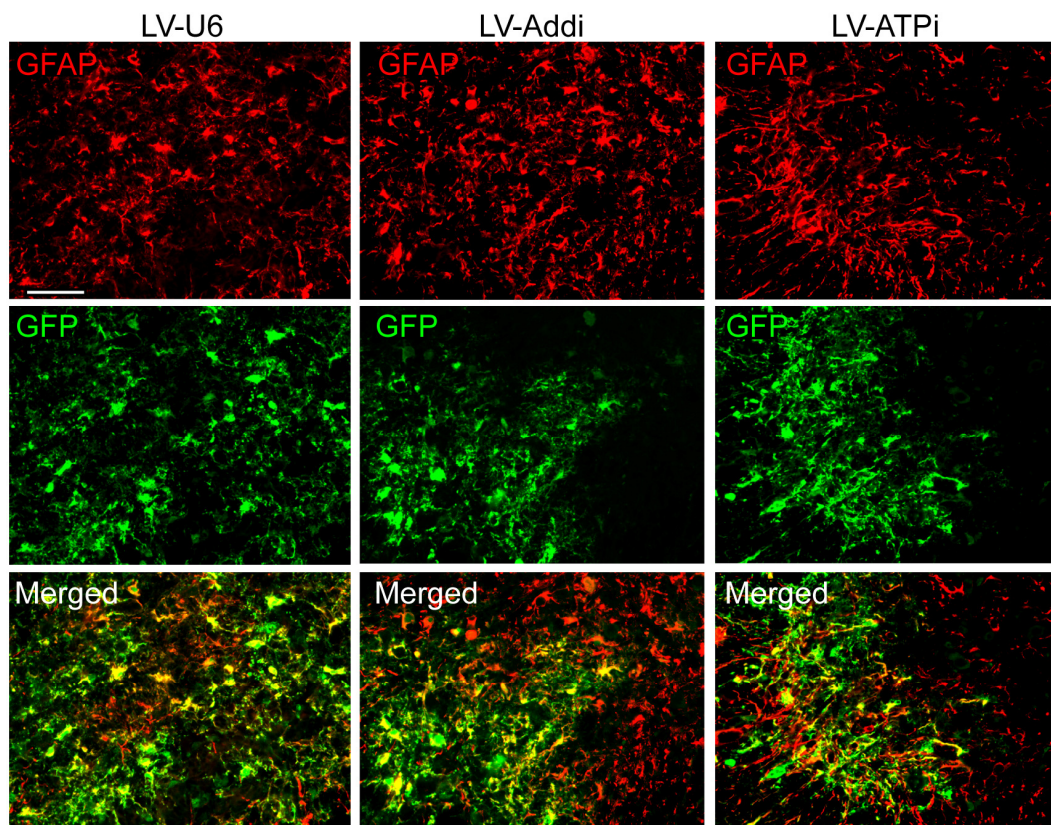

### Supplementary Figure 5

Knockdown of  $\alpha$ -Adducin or  $\alpha$ 2-Na/K ATPase in SOD1<sup>G93A</sup> mice do not alter gliosis in the spinal cord. Spinal cord from SOD1<sup>G93A</sup> mice injected intraspinally with lentivirus expressing short hairpin RNAs targeting  $\alpha$ -Adducin or  $\alpha$ 2-Na/K ATPase or the corresponding control U6 virus were subjected to immunohistochemistry using GFP and the GFAP (red) antibodies. Knockdown of  $\alpha$ -Adducin (LV-Addi) or  $\alpha$ 2-Na/K ATPase (LV-ATPi) had little or no effect on the presence or abundance of astrocytes within the GFP-labeled ventral horn; scale bar 50 $\mu$ m.



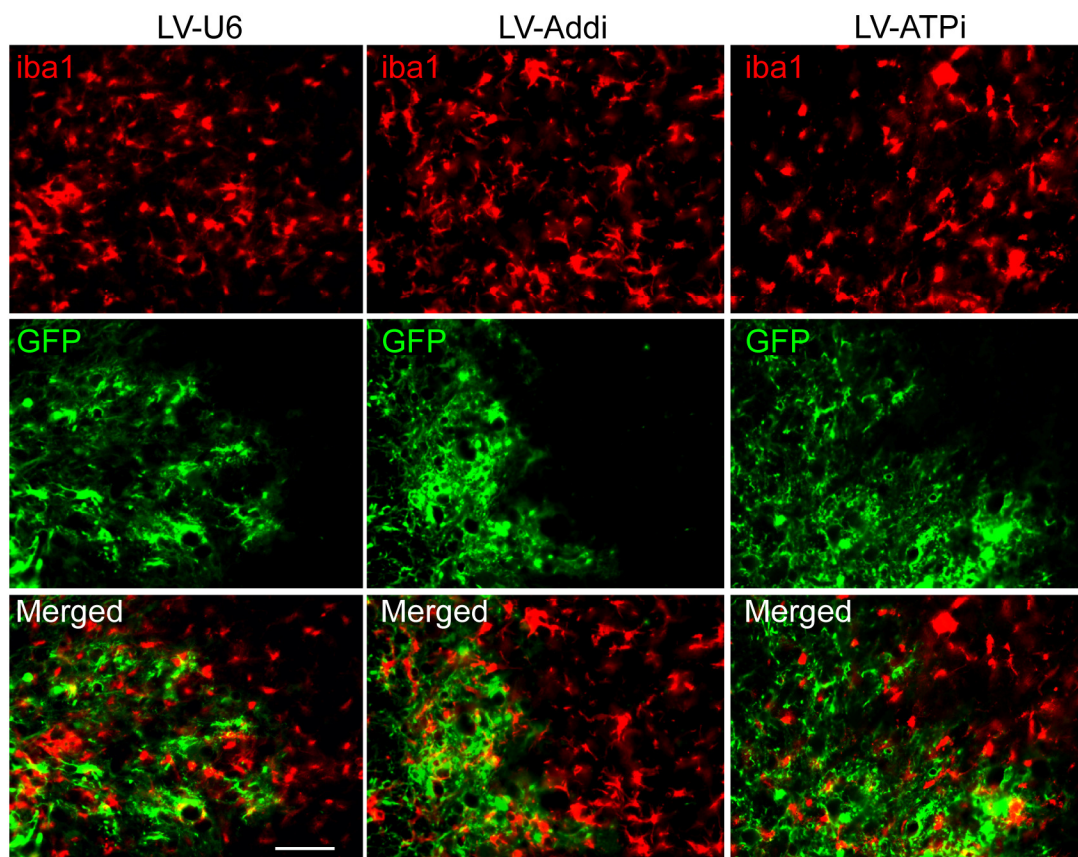

**Supplementary Figure 6**

Knockdown of  $\alpha$ -Adducin or  $\alpha$ 2-Na/K ATPase in SOD1<sup>G93A</sup> mice do not alter microgliosis in spinal cord. Spinal cord from SOD1<sup>G93A</sup> mice injected intraspinally with lentivirus expressing short hairpin RNAs targeting

$\alpha$ -Adducin or  $\alpha$ 2-Na/K ATPase or the corresponding control U6 virus were subjected to immunohistochemistry using GFP and the Iba1 (red) antibodies. Knockdown of  $\alpha$ -Adducin (LV-Addi) or  $\alpha$ 2-Na/K ATPase (LV-ATPi) had little or no effect on the presence or abundance of microglia within the GFP-labeled ventral horn; scale bar 50 $\mu$ m.



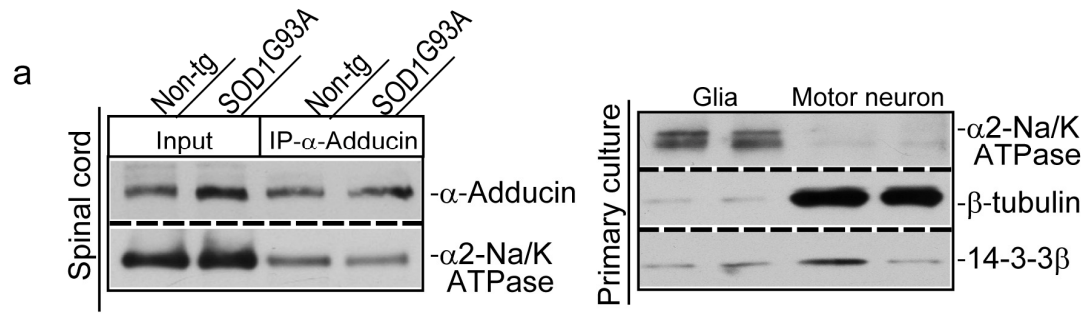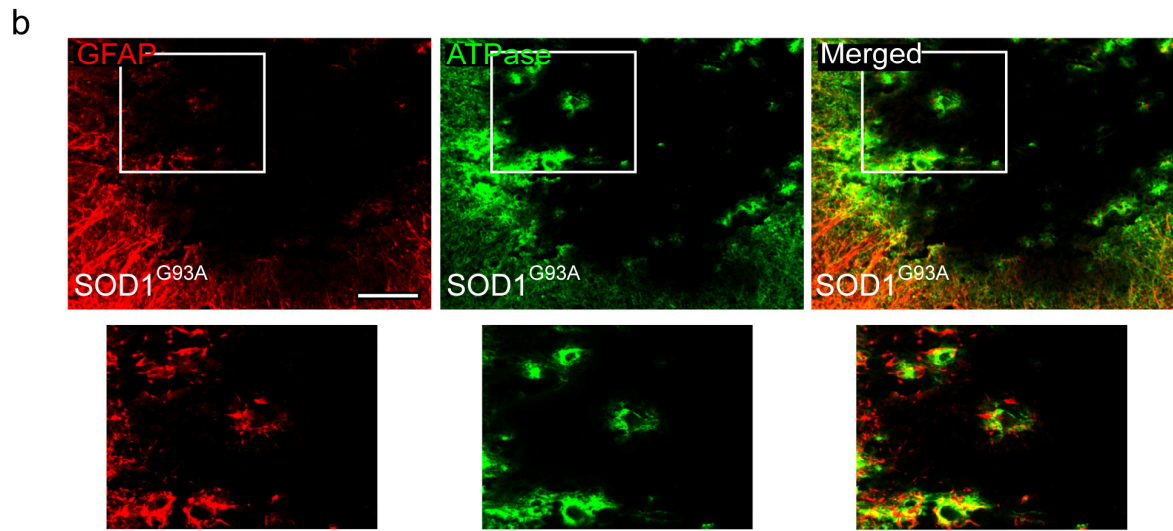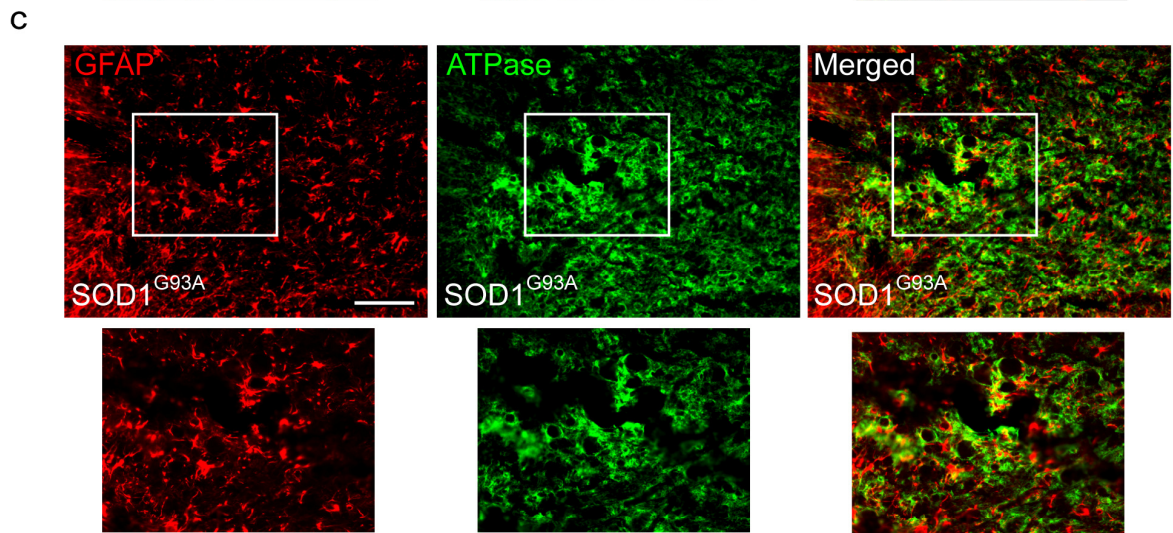

**Supplementary Figure 7**

$\alpha$ 2-Na/K ATPase co-immunoprecipitates with  $\alpha$ -Adducin in spinal cord lysates and is specifically upregulated in astrocytes in symptomatic SOD1<sup>G93A</sup> mice.

(a) Immunoblots show immunoprecipitated  $\alpha$ -Adducin from SOD1<sup>G93A</sup> and control wild type spinal cord lysates subjected to immunoblotting with the  $\alpha$ -Adducin and  $\alpha$ 2-Na/K ATPase antibodies following glycine elution, confirming  $\alpha$ 2-Na/K ATPase as an interactor of  $\alpha$ -Adducin (*left panels*). Immunoblots show  $\alpha$ 2-Na/K ATPase is predominately expressed in primary glial cultures relative to primary motor neuron cultures enriched with the neuron marker  $\beta$ -tubulin. 14-3-3 $\beta$  is used as an internal control (*right panel*). (b) Immunohistochemistry with astrocyte marker GFAP and  $\alpha$ 2-Na/K ATPase antibody in sections of the lumbar spinal cord from SOD1<sup>G93A</sup> mice at 60 days displays  $\alpha$ 2-Na/K ATPase expression within astrocytes; scale bar 50 $\mu$ m. (c) Immunohistochemistry with GFAP and  $\alpha$ 2-Na/K ATPase antibody in sections of the lumbar spinal cord from symptomatic SOD1<sup>G93A</sup> mice at 120 days displays upregulation of  $\alpha$ 2-Na/K ATPase expression within astrocytes; scale bar 50 $\mu$ m. (a) are cropped; full length images are presented in **Supplementary Figure 11**.

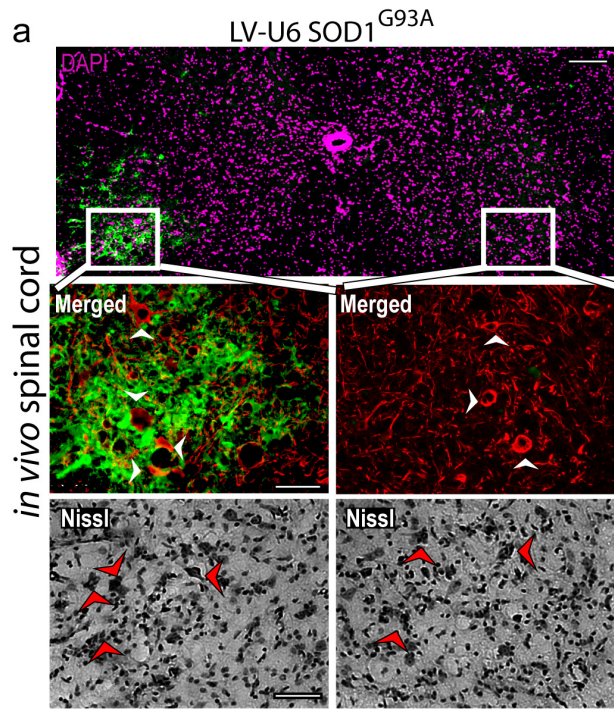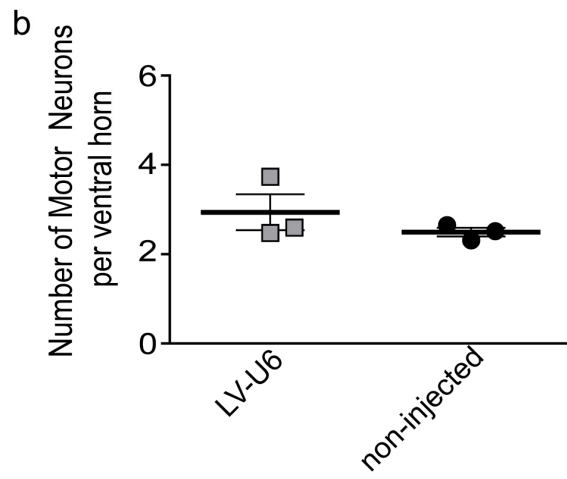

### Supplementary Figure 8

Intraspinal injection of control lentivirus in SOD1<sup>G93A</sup> mice had no effect on motor neuron survival.

(a) Spinal cord from end stage SOD1<sup>G93A</sup> mice injected at age 90 days intraspinaly with the control lentivirus encoding GFP (LV-U6 SOD1<sup>G93A</sup>) was subjected to immunohistochemistry at end stage. End stage was defined as a time point at which the animal was unable to upright itself within 30s of placement on its side.

Immunohistochemistry with GFP in SOD1<sup>G93A</sup> lumbar sections revealed delivery of control injected virus (LV-U6) into the ventral horn; scale bar 100 $\mu$ m. Alternating GFP positive sections were subjected to immunohistochemistry using the GFP antibody and the neurofilament-SMi32 antibody (red), a motor neuron marker, or Nissl stained (*lower panels*) for quantification of surviving motor neurons within GFP-labeled injected ventral horn and contralateral non-injected ventral horn ( $n \geq 20$  sections per animal); scale bar 50 $\mu$ m. Control LV-U6 SOD1<sup>G93A</sup> mice ( $n=3$ ) displayed equivalent degeneration of motor neurons within injected GFP-labeled ventral horn and non-injected contralateral ventral horn. Arrowheads indicate surviving motor neurons; quantification shown in (b).

a

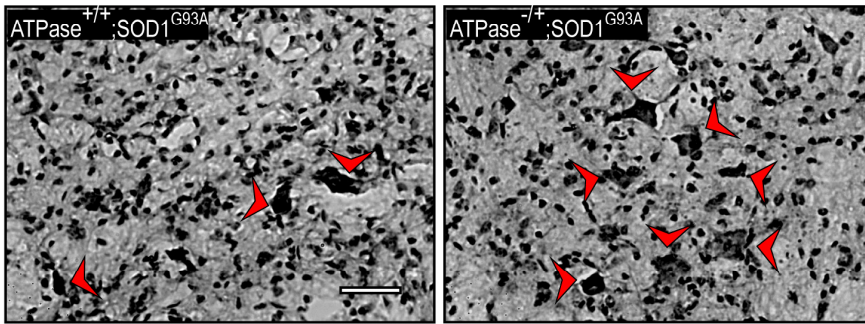

b

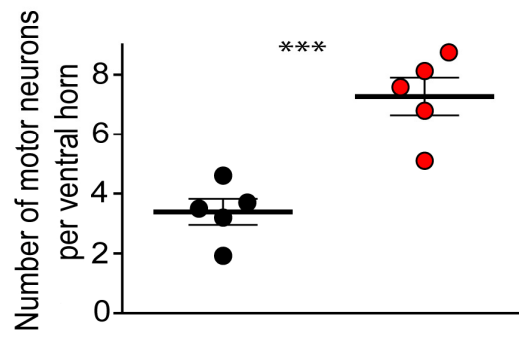

**Supplementary Figure 9**

Heterozygous disruption of the  $\alpha 2$ -Na/K ATPase gene in SOD1<sup>G93A</sup> mice delays motor neuron degeneration.

(a) Nissl stained sections from endstage control SOD1<sup>G93A</sup> mice (n=5) and aged-matched SOD1<sup>G93A</sup> littermates heterozygous-null for the  $\alpha 2$ -Na/K ATPase allele (n=5) displayed more than twice the number of motor neurons in ATPase<sup>+/-</sup>;SOD1<sup>G93A</sup> than control SOD1<sup>G93A</sup> mice. Arrow heads indicate surviving motor neurons; quantification shown in (b); scale bar 50 $\mu$ m (\*\*p<0.001; unpaired t-test).

a

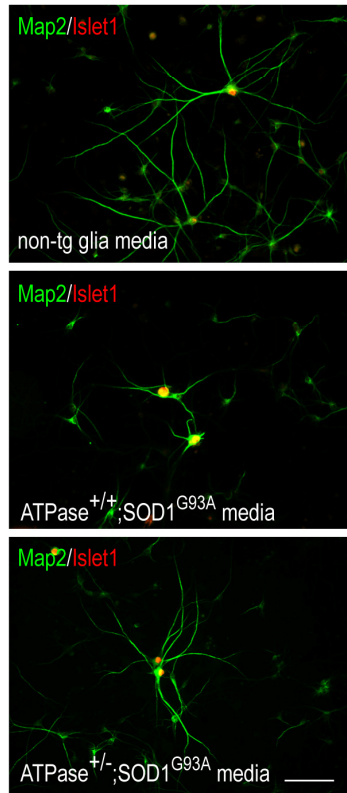

b

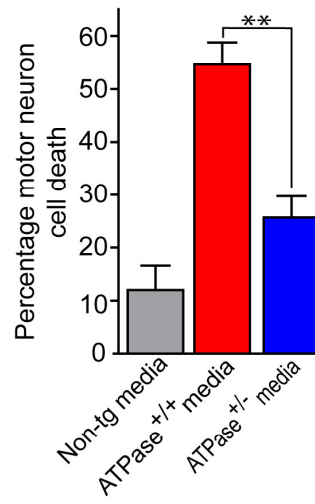

**Supplementary Figure 10**

Condition media from heterozygous-null from  $\alpha 2$ -Na/K ATPase SOD1<sup>G93A</sup> astrocytes is neuroprotective.

(a) Precondition media from wild type, SOD1<sup>G93A</sup>, and heterozygous-null  $\alpha 2$ -Na/K ATPase; SOD1<sup>G93A</sup> astrocytes were exposed to motor neurons and subjected to immunocytochemistry with antibodies recognizing the motor neuron nuclear protein Islet1 (red) and the dendrite protein MAP2 (green); scale bar 50 $\mu$ m.

Precondition media from wild type astrocytes had little or no effect on motor neuron survival (*upper panels*); quantified (b). Preconditioned medium from SOD1<sup>G93A</sup> astrocytes induced non-cell autonomous motor neuron cell death (*middle*); quantified (b). Preconditioned medium from heterozygous-null  $\alpha 2$ -Na/K ATPase; SOD1<sup>G93A</sup> astrocytes protected motor neurons against the non-cell autonomous cell death (*lower panel*); All data in bar charts show mean  $\pm$  s.e.m (\*\*\*) $p < 0.001$ ; unpaired t-test).



Fig. 1a

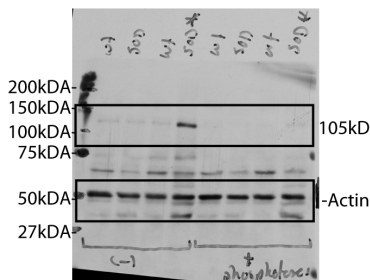

Fig. 1b

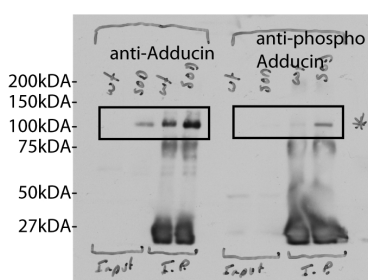

Fig. 1c

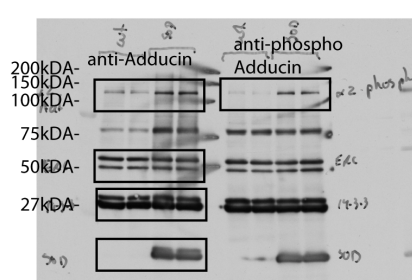

Fig. 1d

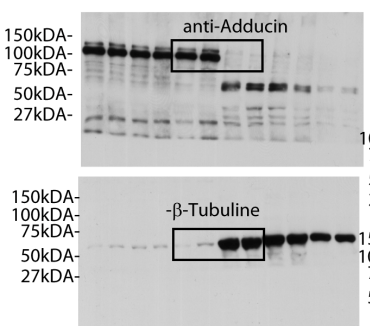

Fig. 3a

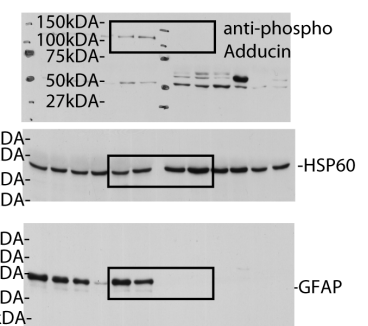

Fig. 3a

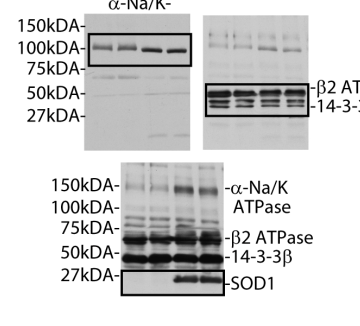

Fig. 3b

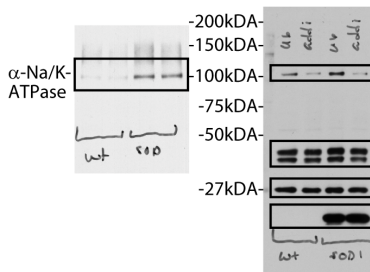

Fig. 6a

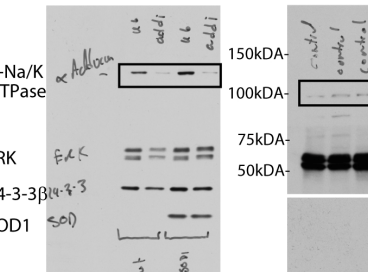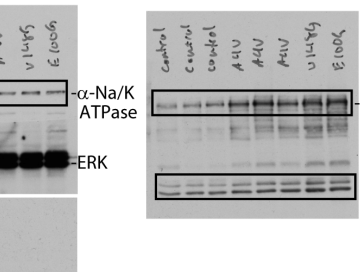

Fig. 6d

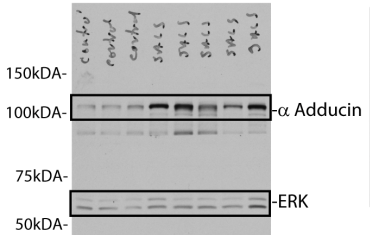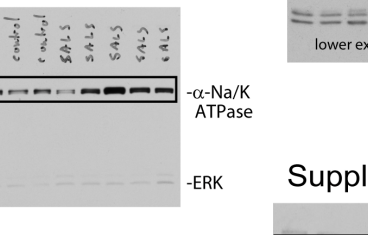

Supplementary Fig. 1

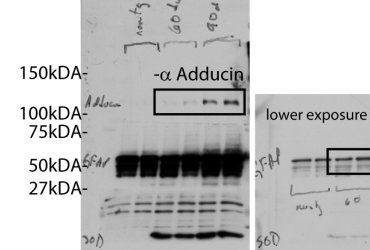

Supplementary Fig. 2

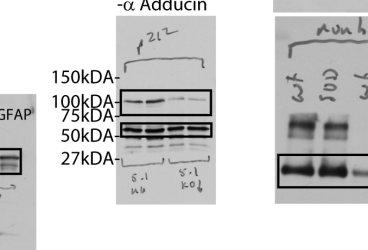

Supplementary Fig. 7a

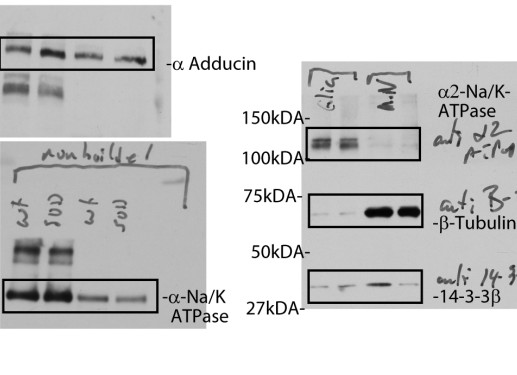

**Supplementary Figure 11**

Full scans of key Western blot data. In many experiments, membranes were stripped and reblotted with a second antibody.
